# Supplementary material
Source: ML conference proceedings conference paper supplement (https://openreview.net/forum?id=RFLZFxoLnE)

Validation Accuracy

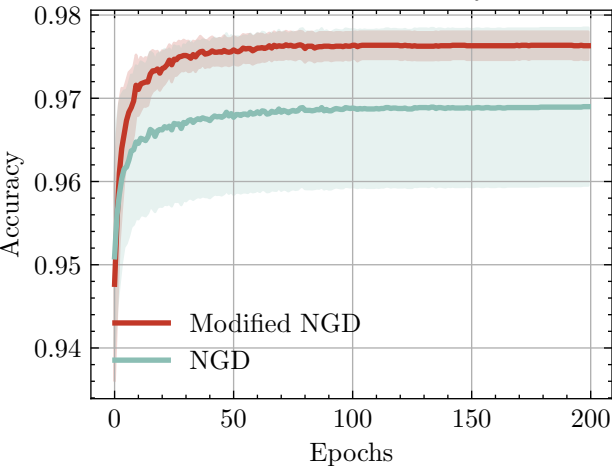

Supplement: supplementary_material [file attachment]

# Difference of Test Loss between NGD and Modified NGD

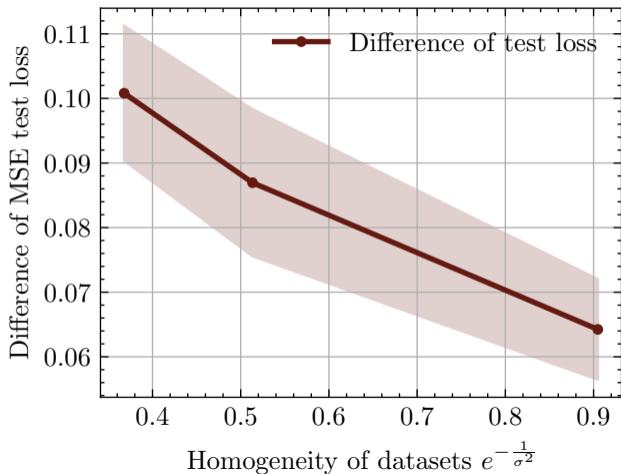

Supplement: supplementary_material [file attachment]

# Eigenvalues Preserved Proportion During Training

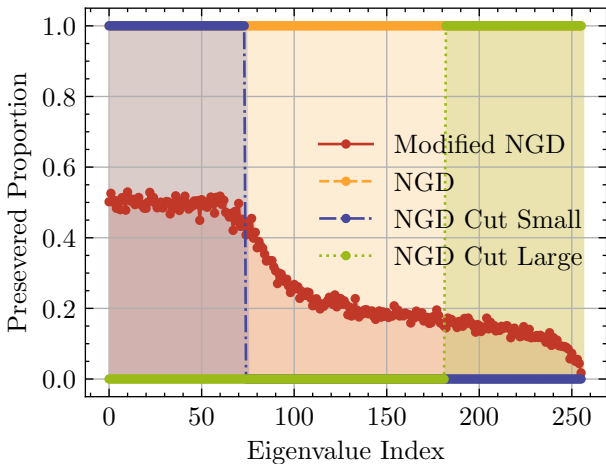

Supplement: supplementary_material [file attachment]

Train Loss

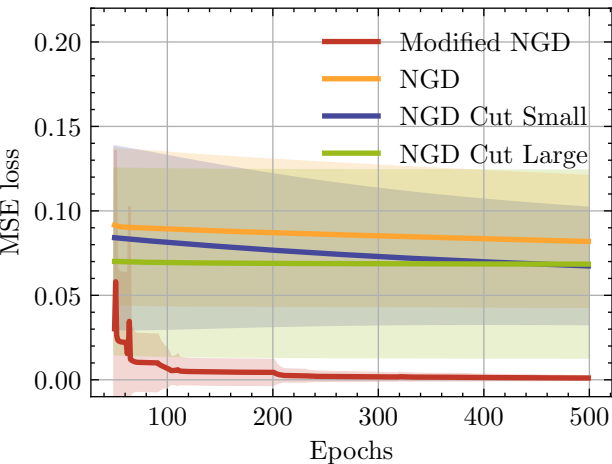

Supplement: supplementary_material [file attachment]

Test Loss

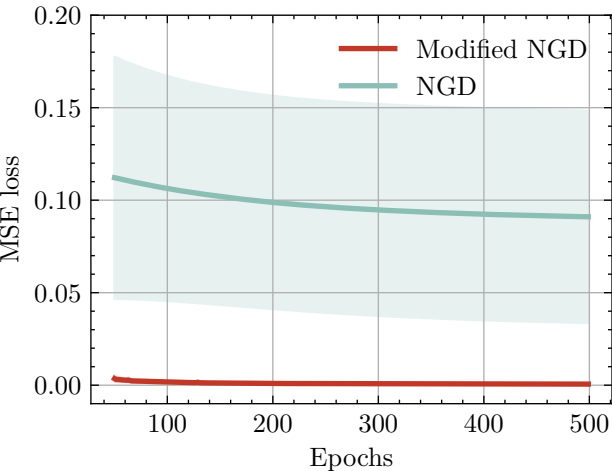

Supplement: supplementary_material [file attachment]

Train Loss

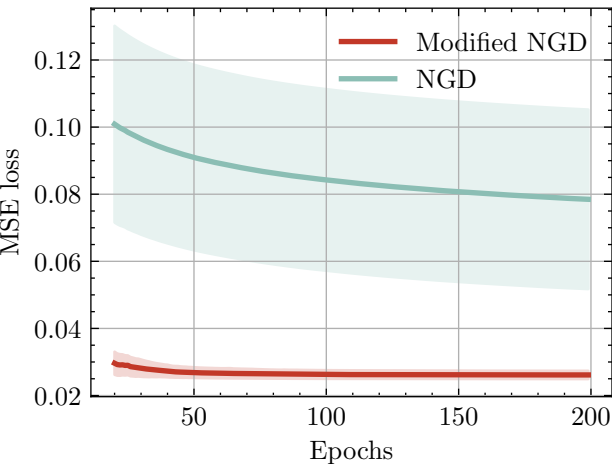

Supplement: supplementary_material [file attachment]

Test Loss

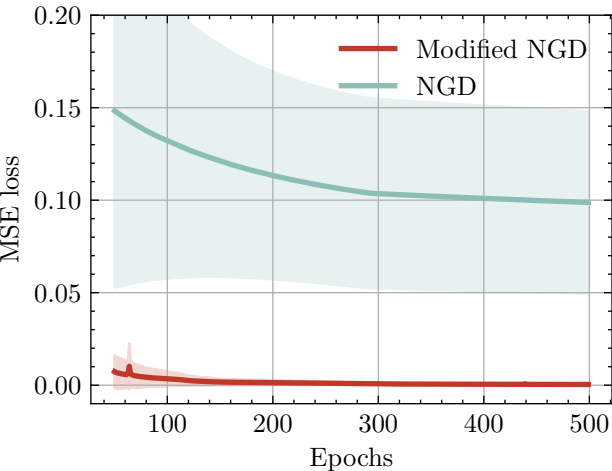

Supplement: supplementary_material [file attachment]

Test Accuracy

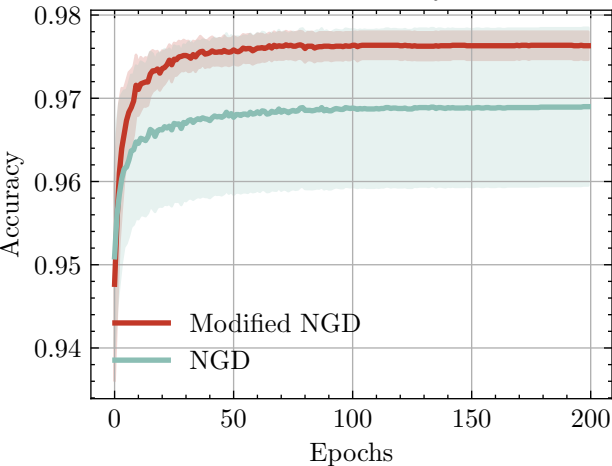

Supplement: supplementary_material [file attachment]

Train Loss

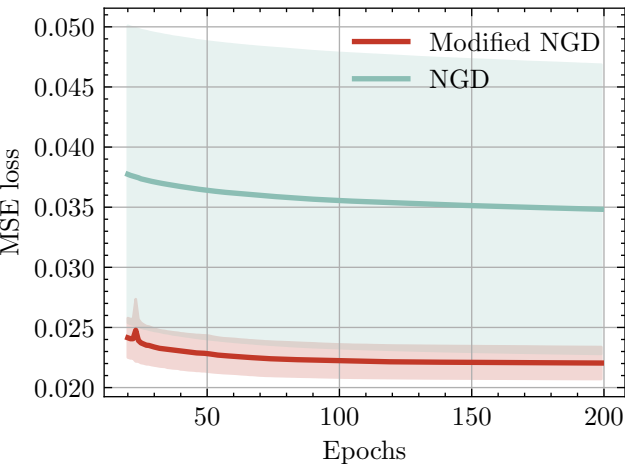

Supplement: supplementary_material [file attachment]

Train Loss

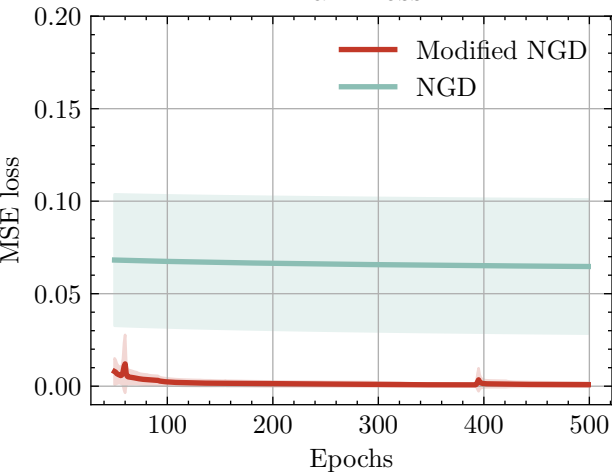

Supplement: supplementary_material [file attachment]

Test Loss

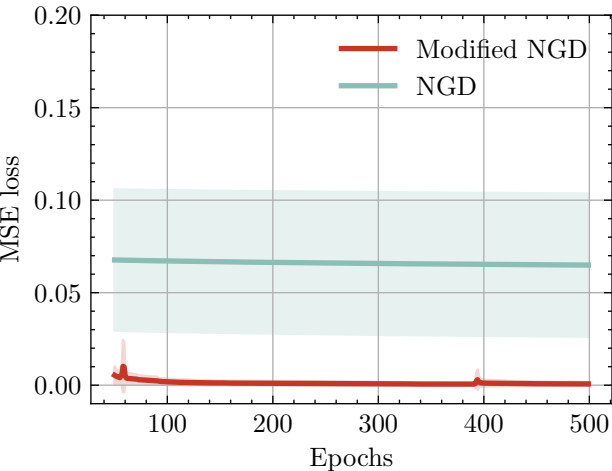

Supplement: supplementary_material [file attachment]

Validation Loss

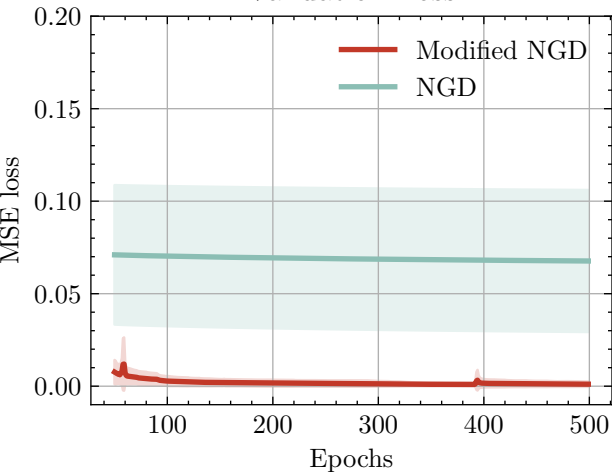

Supplement: supplementary_material [file attachment]

Train Loss

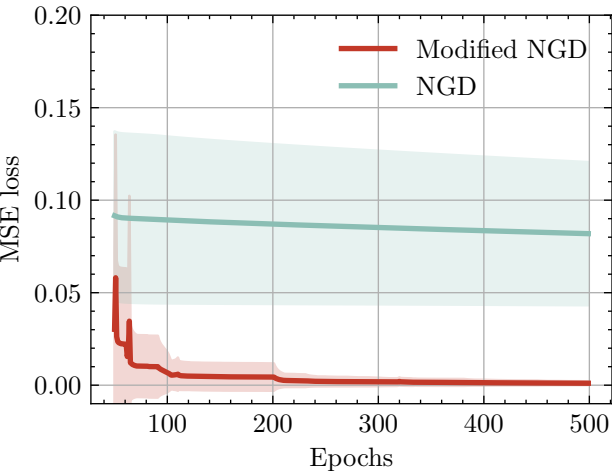

Supplement: supplementary_material [file attachment]

# Eigenvalues Preserved Proportion During Training

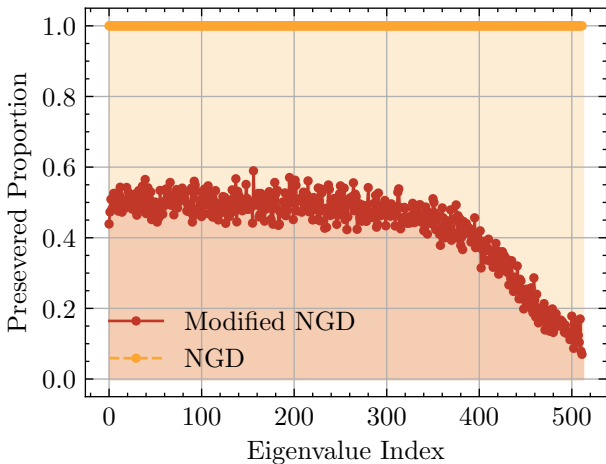

Supplement: supplementary_material [file attachment]

Train Loss

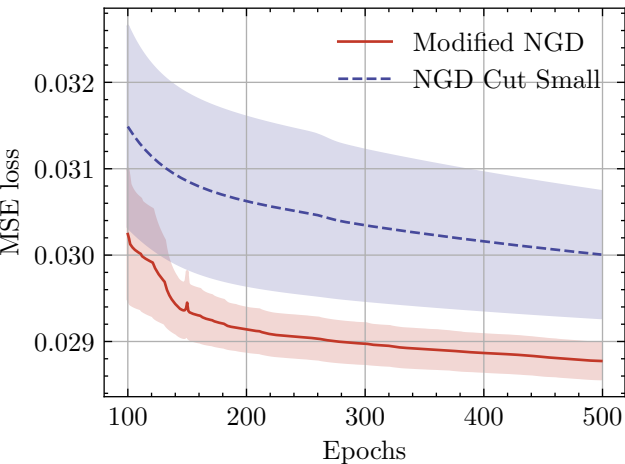

Supplement: supplementary_material [file attachment]

Test Loss

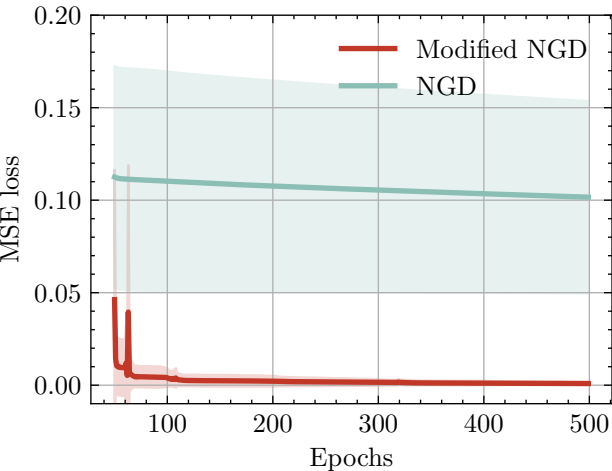

Supplement: supplementary_material [file attachment]

# Validation Loss

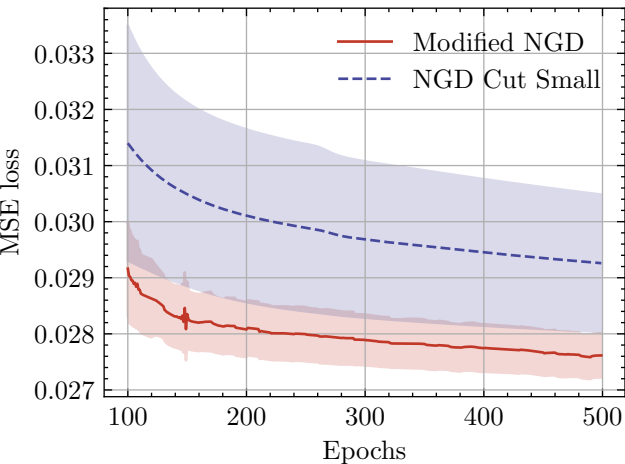

Supplement: supplementary_material [file attachment]

Validation Accuracy

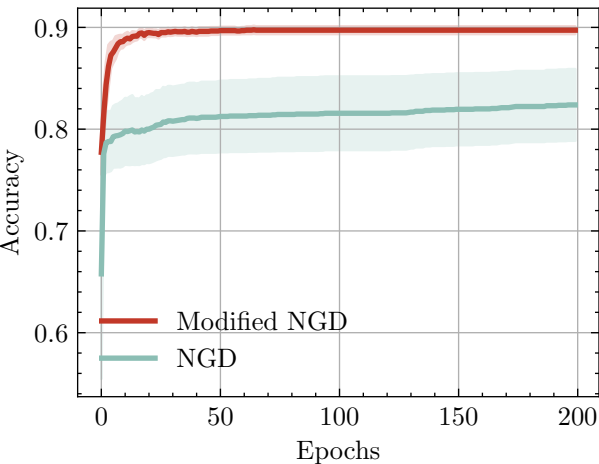

Supplement: supplementary_material [file attachment]

Test Loss

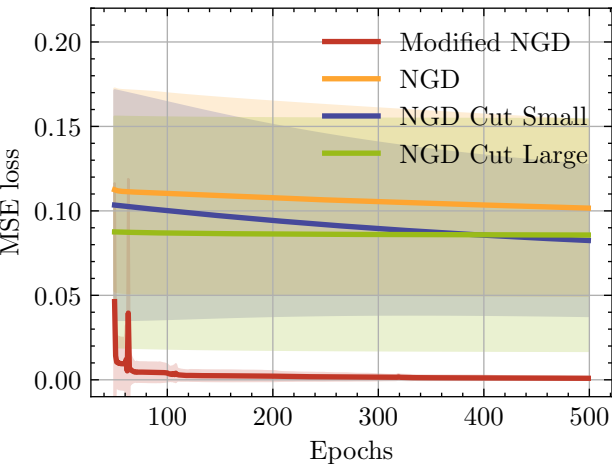

Supplement: supplementary_material [file attachment]

# Validation Loss

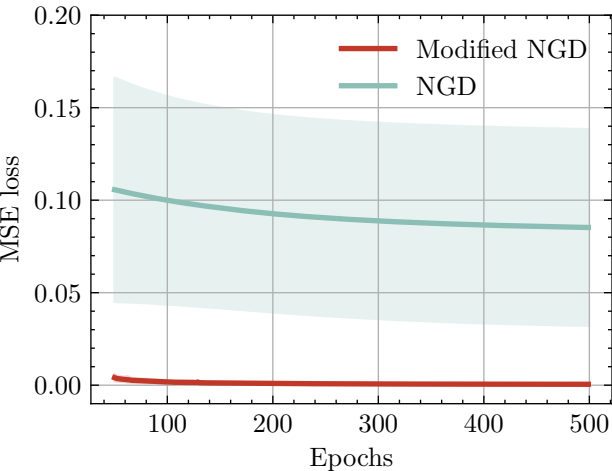

Supplement: supplementary_material [file attachment]

Eigenvalues Preserved Proportion During Training

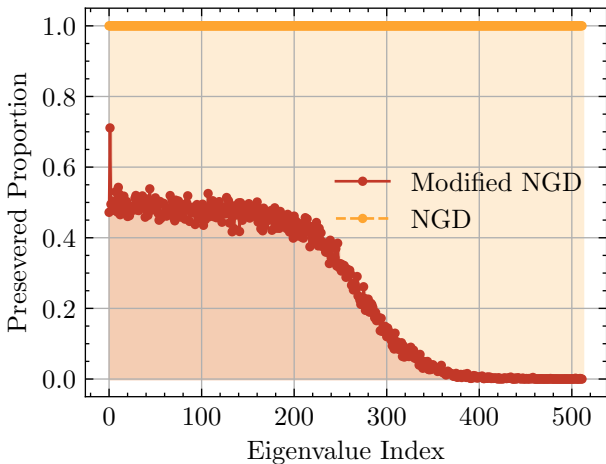

Supplement: supplementary_material [file attachment]

Train Loss

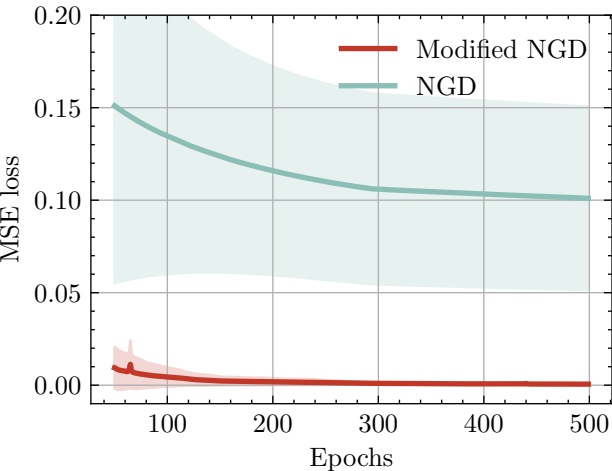

Supplement: supplementary_material [file attachment]

Test Loss

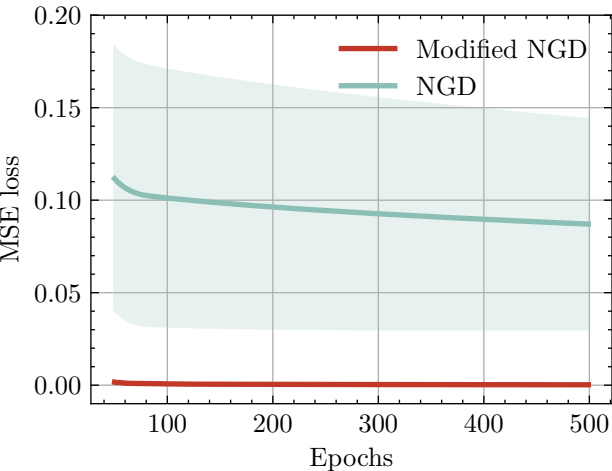

Supplement: supplementary_material [file attachment]

Train Loss

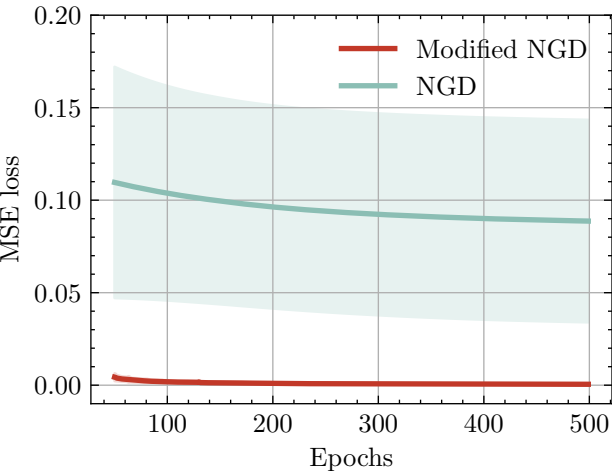

Supplement: supplementary_material [file attachment]

Train Loss

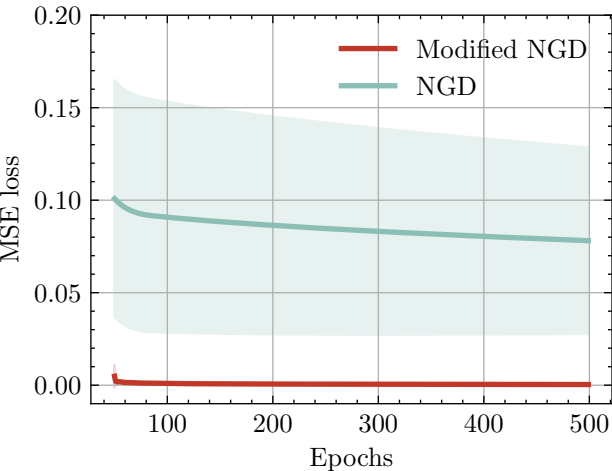

Supplement: supplementary_material [file attachment]

Test Loss

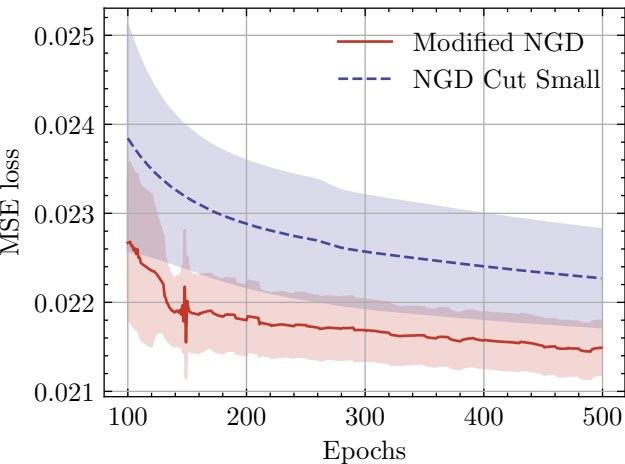

Supplement: supplementary_material [file attachment]

Test Accuracy

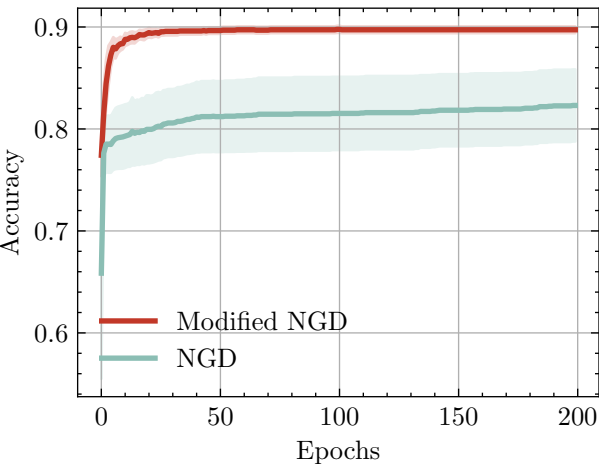

Supplement: supplementary_material [file attachment]

# Validation Loss

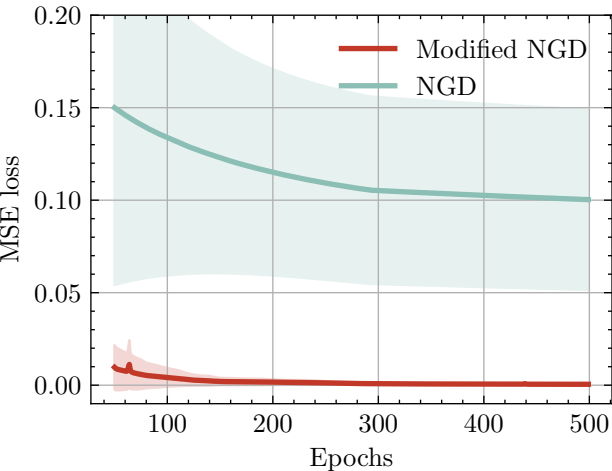

Supplement: supplementary_material [file attachment]

# Validation Loss

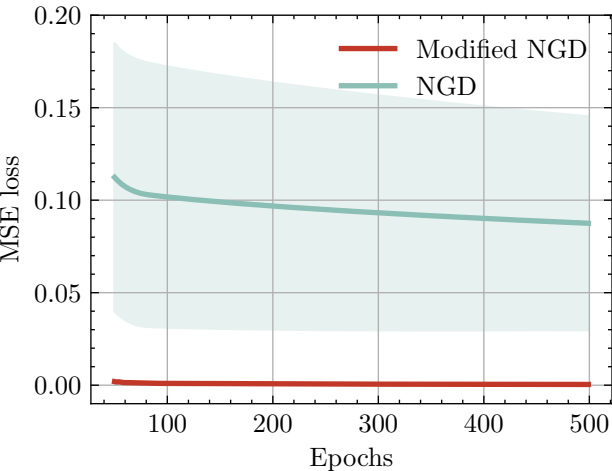

Supplement: supplementary_material [file attachment]

Validation Loss

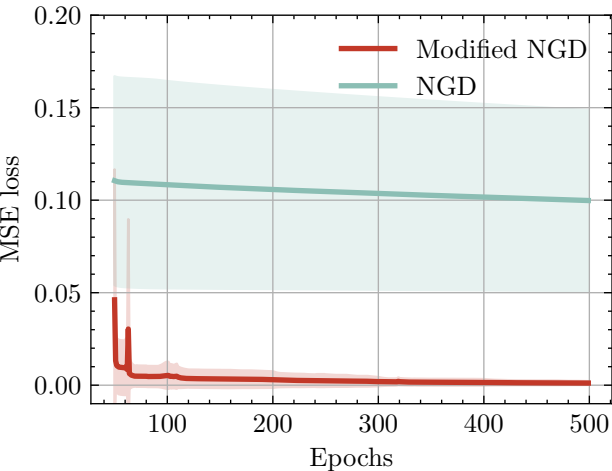

Supplement: supplementary_material [file attachment]

# Validation Loss

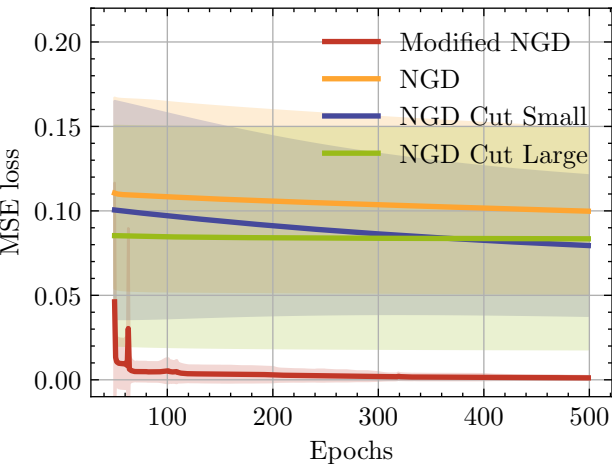

Supplement: supplementary_material [file attachment]
